# Supplementary material for: Water recycling efficacies of extremely hygroscopic, antifouling hydrogels
Source: Royal Society of Chemistry journal article supplement (doi:10.1039/c8ra07915c), 2018-01-01
Supplement: c8ra07915c1.pdf [file c8ra07915c1.pdf]

## Supporting Information

### Water Recycling Efficacies of Extremely Hygroscopic, Antifouling Hydrogels

Anayet Kabir<sup>1</sup>, Matthew J Dunlop<sup>1,2</sup>, Bishnu Acharya<sup>2</sup>, Rabin Bissessur<sup>1</sup> & Marya  
Ahmed<sup>1,2\*</sup>,

<sup>1</sup>*Department of Chemistry, University of Prince Edward Island, Charlottetown, PEI, C1A  
4P3*

<sup>2</sup>*Faculty of Sustainable Design & Engineering, University of Prince Edward Island,  
Charlottetown, PEI, C1A 4P3*

\*Corresponding author: [marahmed@upei.ca](mailto:marahmed@upei.ca)

**$\beta$ -Alanine**

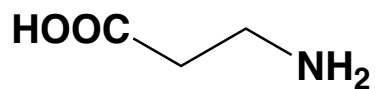

**Pantothenic Acid**

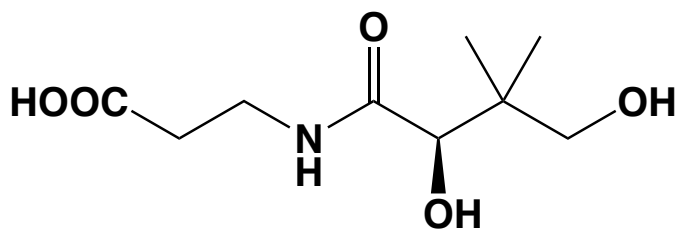

**AEMA**

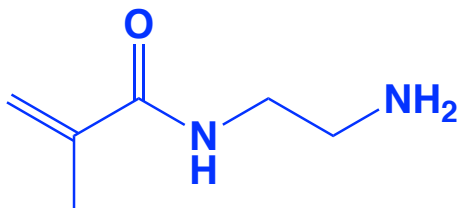

**B5AMA**

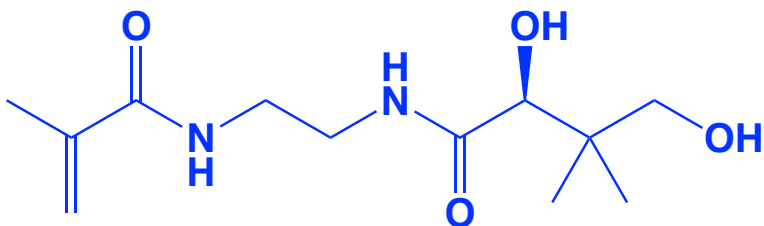

**Figure S1:** Chemical structures of  $\beta$ -alanine, pantothenic acid, 2-aminorthylmethacrylamide (AEMA) and vitamin B5 analogous monomer B5AMA.

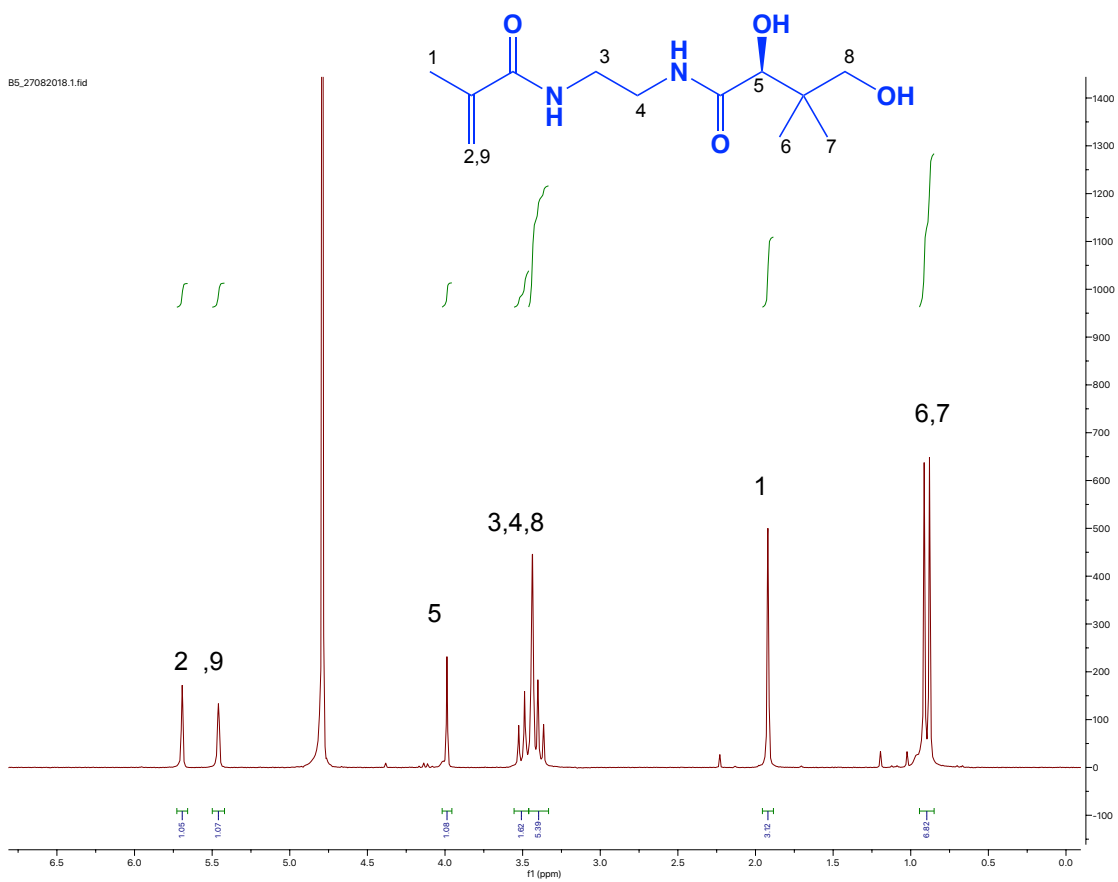

**Figure S2:**  $^1\text{H}$ -NMR spectra of B5AMA in  $\text{D}_2\text{O}$ .

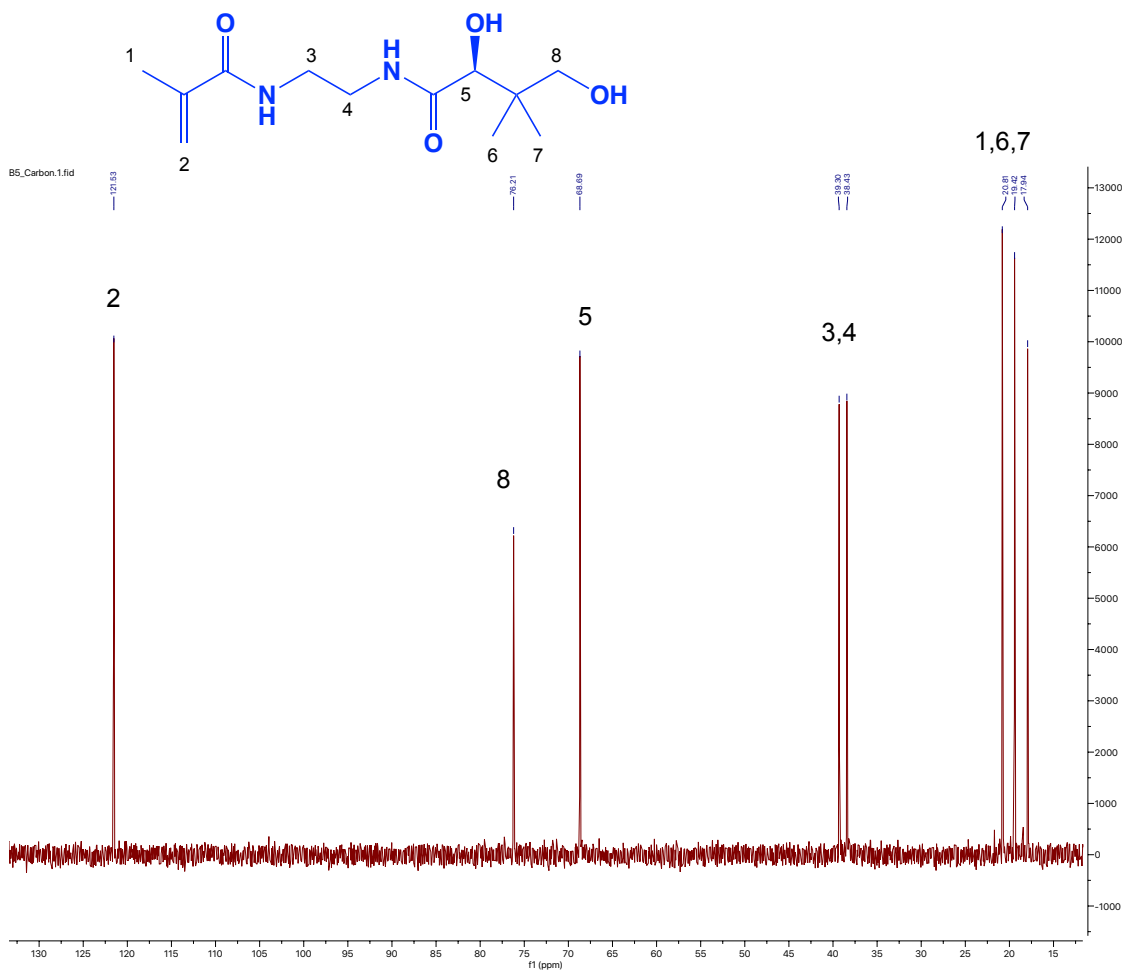

**Figure S3:** DEPT 45  $^{13}\text{C}$ -NMR spectra of B5AMA.

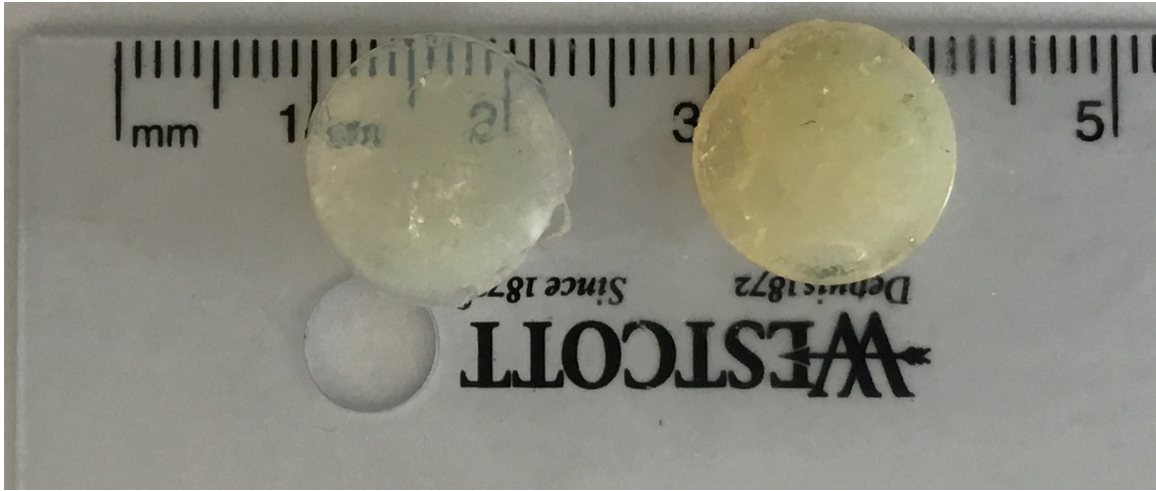

**Figure S4:** Photograph of B5AMA-10 hydrogels (left) before the release of water 25 °C, and (right) after the release of water at 37 °C.

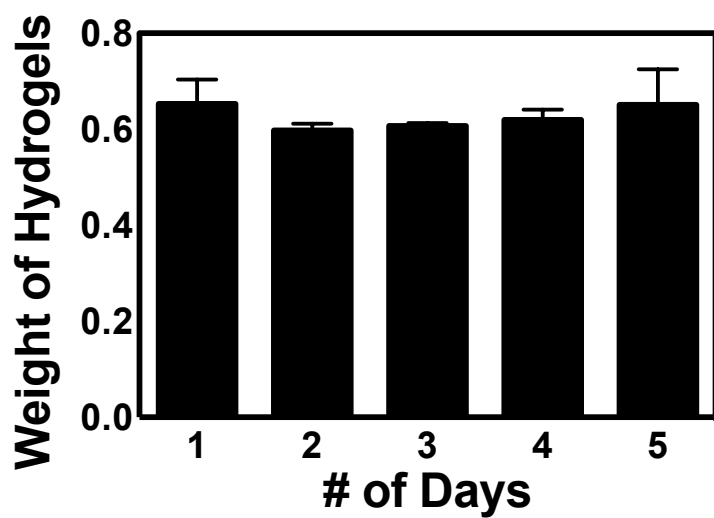

**Figure S5:** Weights of B5AMA-10 hydrogels recorded during the release of water during repeated cycles of water absorption and desorption for the period of five days.
